# Supplementary material for: One-step approach for preparing ozone gas sensors based on hierarchical NiCo2O4 structures
Source: Royal Society of Chemistry journal article supplement (doi:10.1039/c6ra18384k), 2016-01-01
Supplement: c6ra18384k1.pdf [file c6ra18384k1.pdf]

## SUPPLEMENTARY MATERIAL

### **One-step approach for preparing ozone gas sensors based on hierarchical NiCo<sub>2</sub>O<sub>4</sub> structures.**

Nirav Joshi

*São Carlos Institute of Physics, University of São Paulo, CP 369, São Carlos 13560-970, São Paulo, Brazil*

Luís F. da Silva

*LIEC, Institute of Chemistry, São Paulo State University, P.O. Box 355, 14800-900, Araraquara, SP, Brazil,*

Harsharaj Jadhav

*Department of Energy Science and Technology, Myongji University, Cheoin-gu, Yongin-si, South Korea.*

Jean-Claude M'Peko

*São Carlos Institute of Physics, University of São Paulo, CP 369, São Carlos 13560-970, São Paulo, Brazil*

Bruno Bassi Millan Torres

*São Carlos Institute of Physics, University of São Paulo, CP 369, São Carlos 13560-970, São Paulo, Brazil*

Khalifa Aguir

*Aix Marseille Université, CNRS IM2NP (UMR 7334), FS St Jérôme S152, Marseille, 13397, France*

Valmor R. Mastelaro

*São Carlos Institute of Physics, University of São Paulo, CP 369, São Carlos 13560-970, São Paulo, Brazil*

Oswaldo N. Oliveira Jr.

*São Carlos Institute of Physics, University of São Paulo, CP 369, São Carlos 13560-970, São Paulo, Brazil*

---

\* Corresponding author. Email: [nirav.joshi1986@gmail.com](mailto:nirav.joshi1986@gmail.com)

Tel: +5516991200879

## FIGURES AND CAPTIONS:

Figure S1: Schematic illustration of the synthesis of NiCo<sub>2</sub>O<sub>4</sub> hexagonal platelets.

Figure S2: XRD patterns of (a) NiCo-pre and (b) NiCo<sub>2</sub>O<sub>4</sub> hexagonal platelets

Figure S3: TEM images (a and b) of NiCo<sub>2</sub>O<sub>4</sub> hexagonal platelets and corresponding SAED pattern (inset)

Figure S4: TGA curve of NiCo<sub>2</sub>O<sub>4</sub> under air flow with temperature ramp of 10 °C min<sup>-1</sup>

Figure S5: Gas sensing response of the NiCo<sub>2</sub>O<sub>4</sub> exposed for different times for 80 ppb O<sub>3</sub> at 200 °C.

Figure S6: Gas sensing response for NiCo<sub>2</sub>O<sub>4</sub> hexagonal platelets upon exposure to ozone (80 ppb) at room temperature.

Figure S7: Gas sensing response for NiCo<sub>2</sub>O<sub>4</sub> hexagonal platelets upon exposure to ozone (80 ppb) at an operating temperature 50 °C.

Figure S8: Gas sensing response for NiCo<sub>2</sub>O<sub>4</sub> hexagonal platelets upon exposure to ozone (80 ppb) at an operating temperature 100 °C.

Figure S9: Gas sensing response for NiCo<sub>2</sub>O<sub>4</sub> hexagonal platelets upon exposure to ozone (80 ppb) at an operating temperature 150 °C.

Figure S10: Gas sensing response for NiCo<sub>2</sub>O<sub>4</sub> hexagonal platelets upon exposure to ozone (80 ppb) at an operating temperature 200 °C.

Figure S11: Gas sensing response for NiCo<sub>2</sub>O<sub>4</sub> hexagonal platelets upon exposure to ozone (80 ppb) at an operating temperature 250 °C.

Figure S12: Gas sensing response for NiCo<sub>2</sub>O<sub>4</sub> hexagonal platelets upon exposure to ozone (80 ppb) at an operating temperature 300 °C.

Figure S13: Ozone gas sensing response for the NiCo<sub>2</sub>O<sub>4</sub> thin film as a function of the gas level at an operating temperature of 200 °C

Figure S14: Gas sensing response for NiCo<sub>2</sub>O<sub>4</sub> hexagonal platelets upon exposure to different NH<sub>3</sub> concentrations at an operating temperature of 200 °C.

Figure S15: Gas sensing response for NiCo<sub>2</sub>O<sub>4</sub> hexagonal platelets upon exposure to different NO<sub>2</sub> concentrations at an operating temperature of 200 °C.

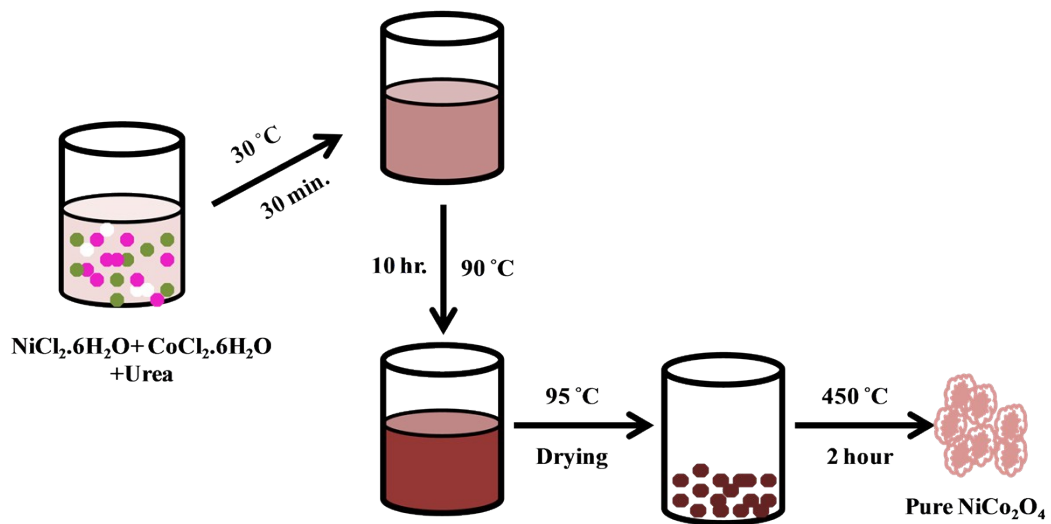

Figure S1. Nirav Joshi et al.

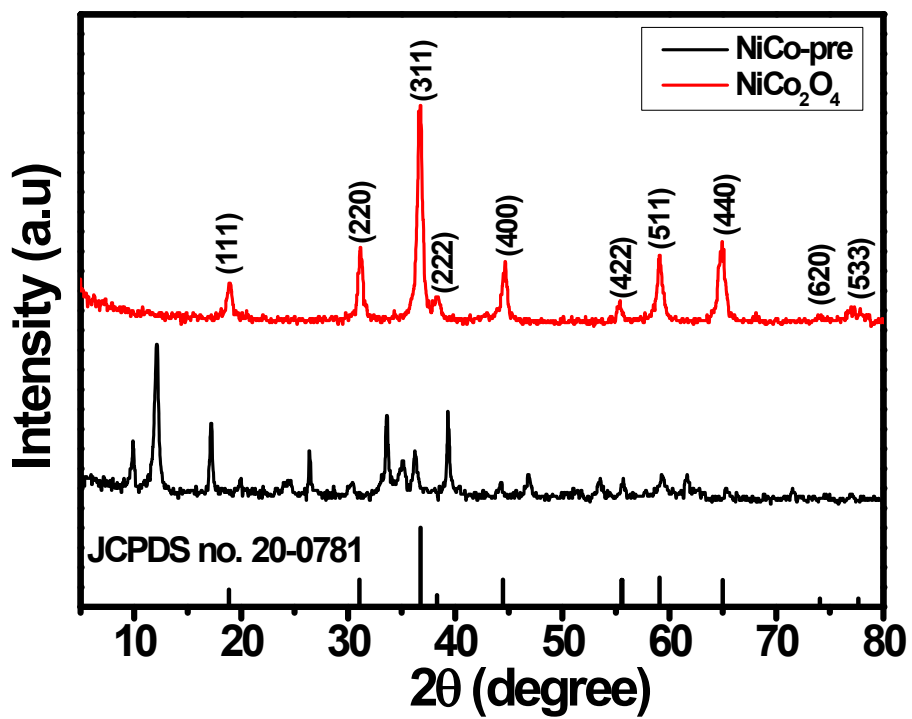

Figure S2. Nirav Joshi et al.

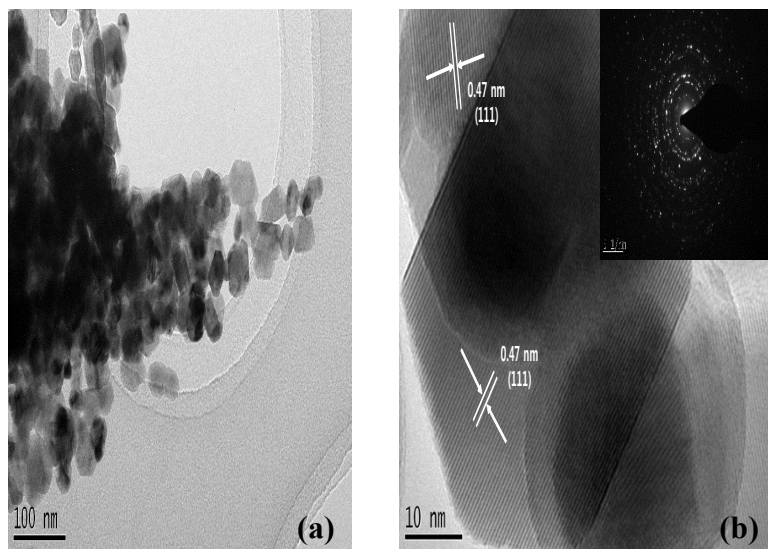

Figure S3. Nirav Joshi et al.

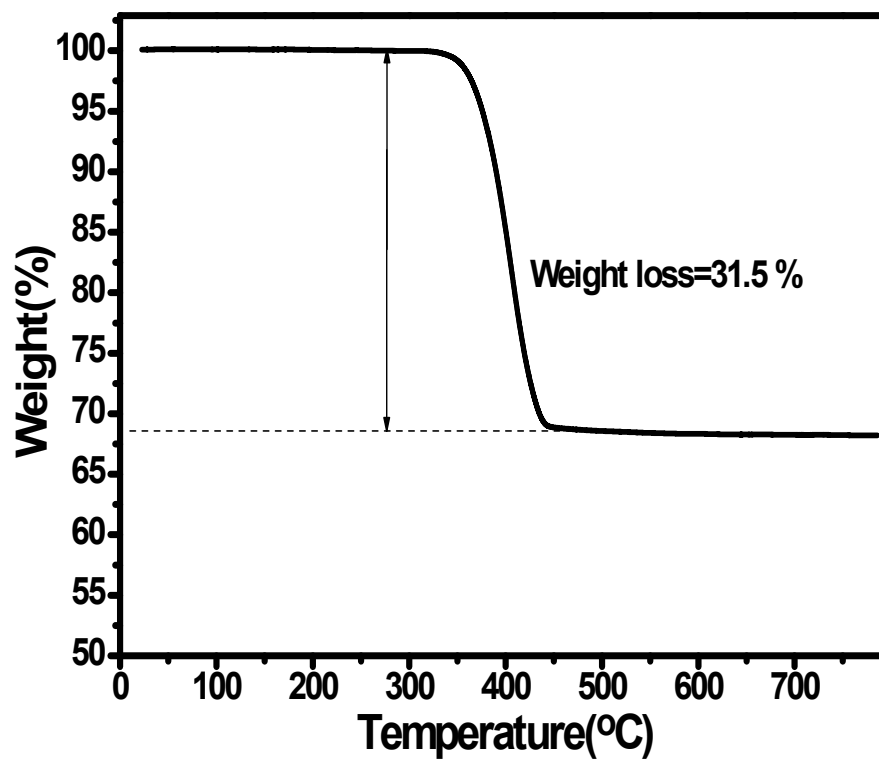

Figure S4. Nirav Joshi et al.

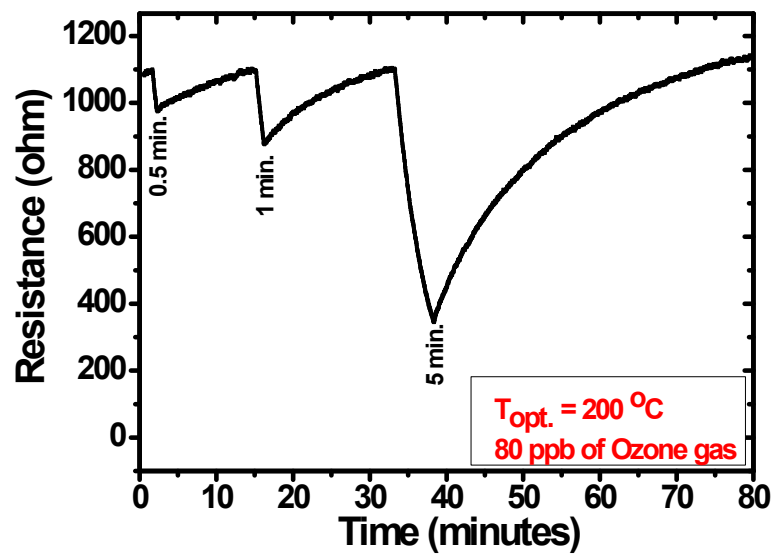

Figure S5. Nirav Joshi et al.



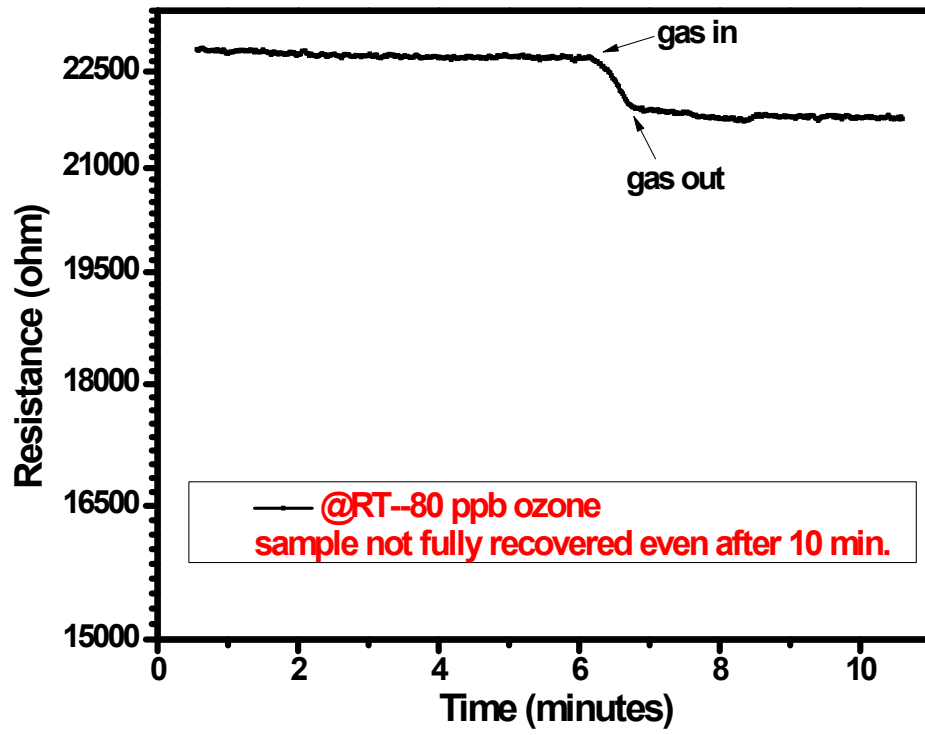

Figure S6. Nirav Joshi et al.

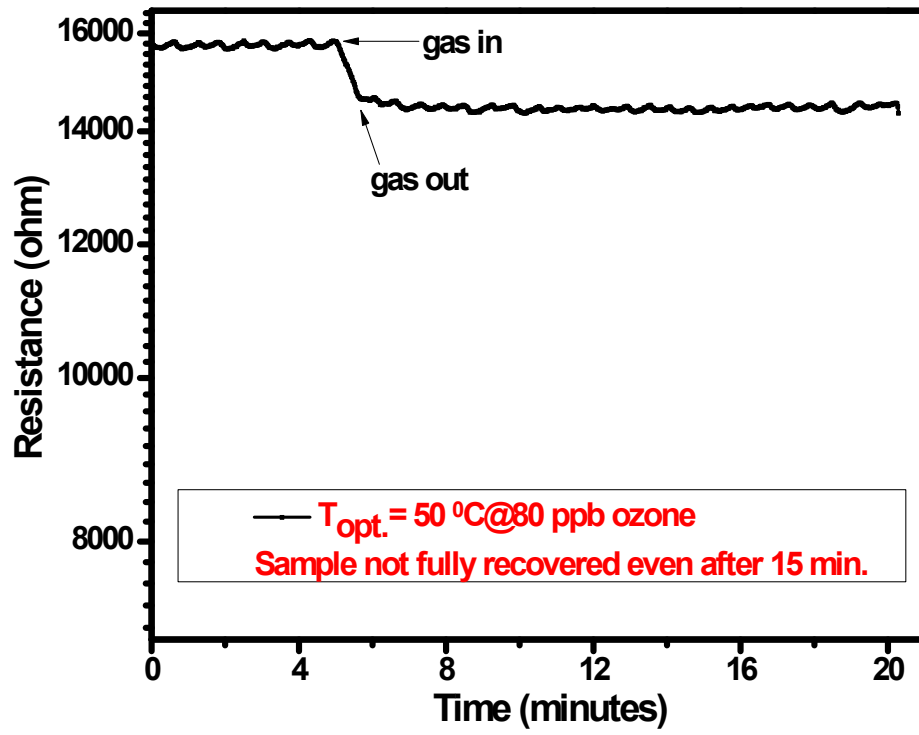

Figure S7. Nirav Joshi et al.

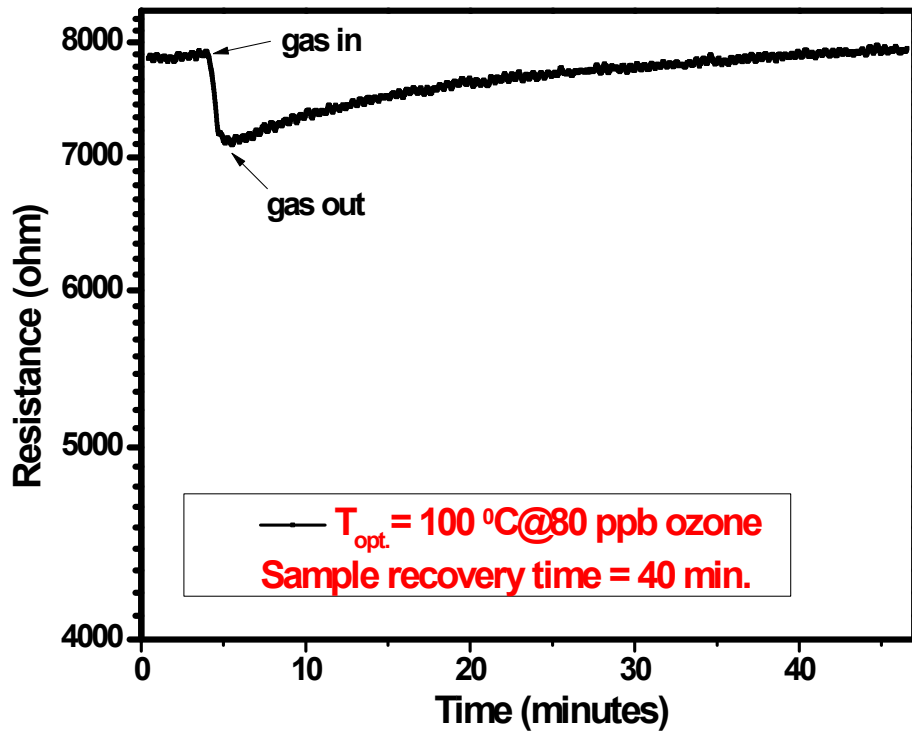

Figure S8. Nirav Joshi et al.

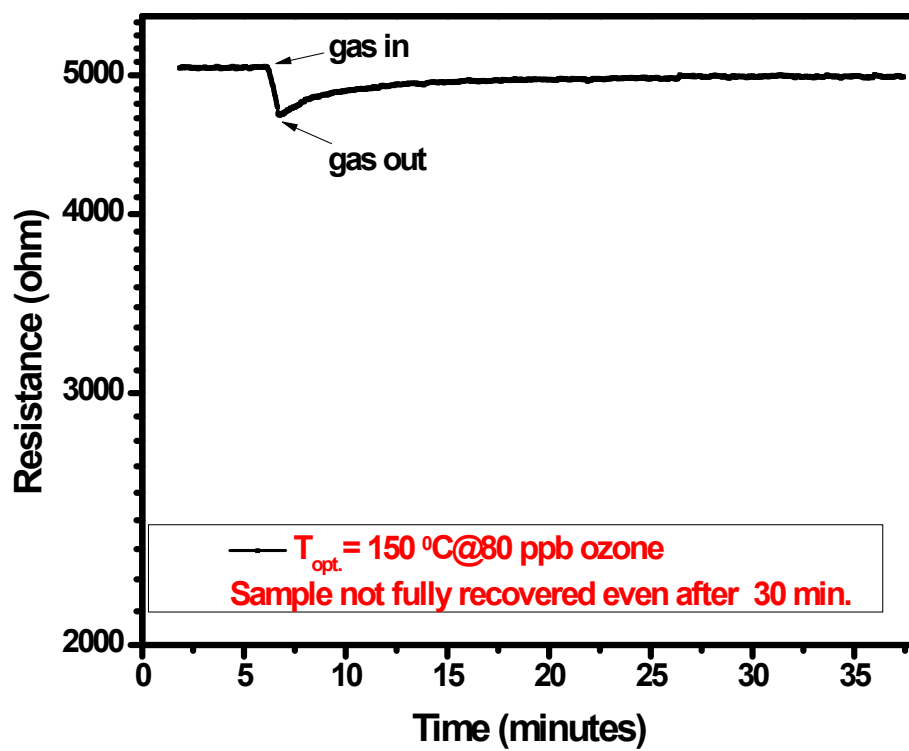

Figure S9. Nirav Joshi et al.

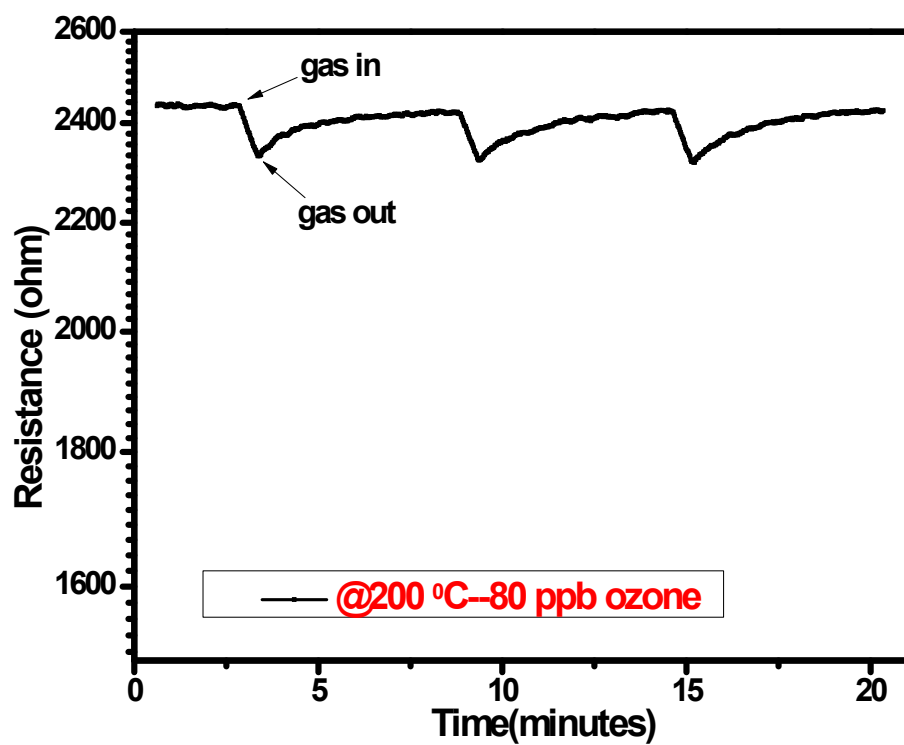

Figure S10. Nirav Joshi et al.

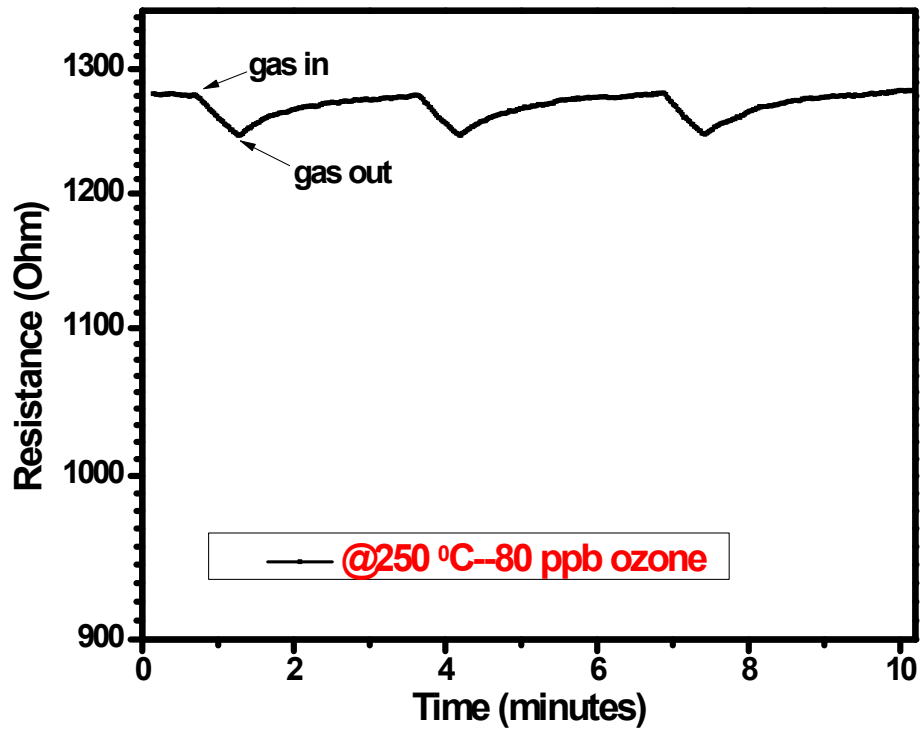

Figure S11. Nirav Joshi et al.

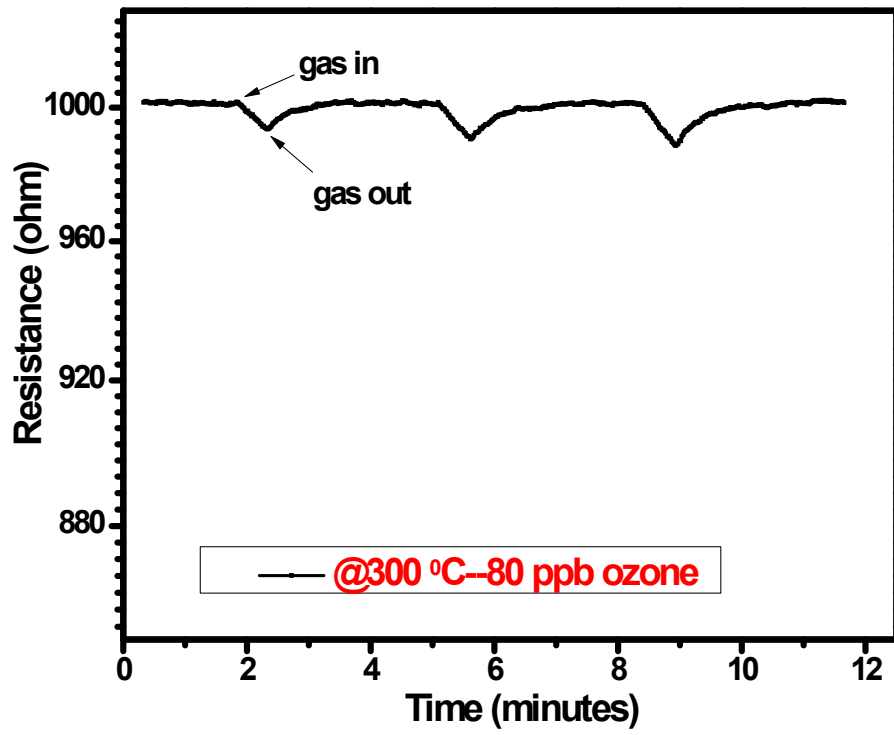

Figure S12. Nirav Joshi et al.

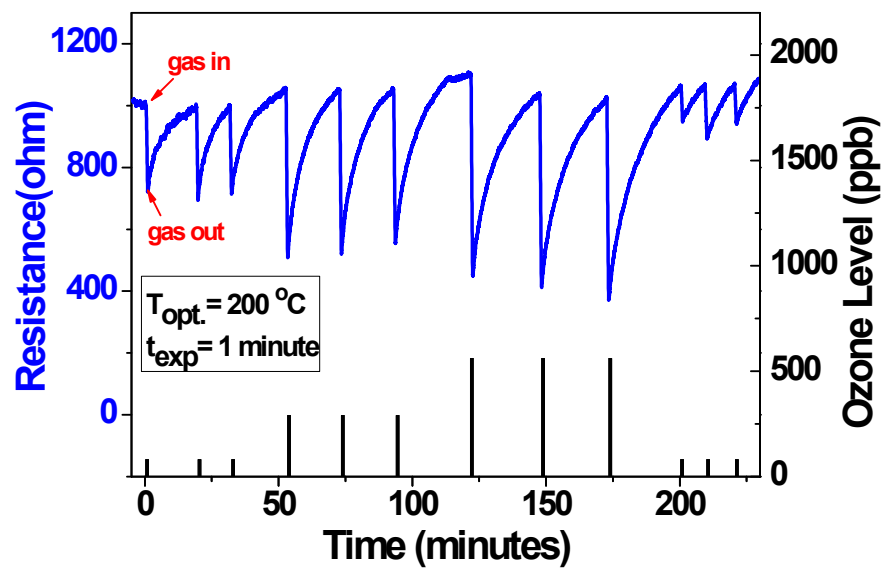

Figure S13. Nirav Joshi et al.



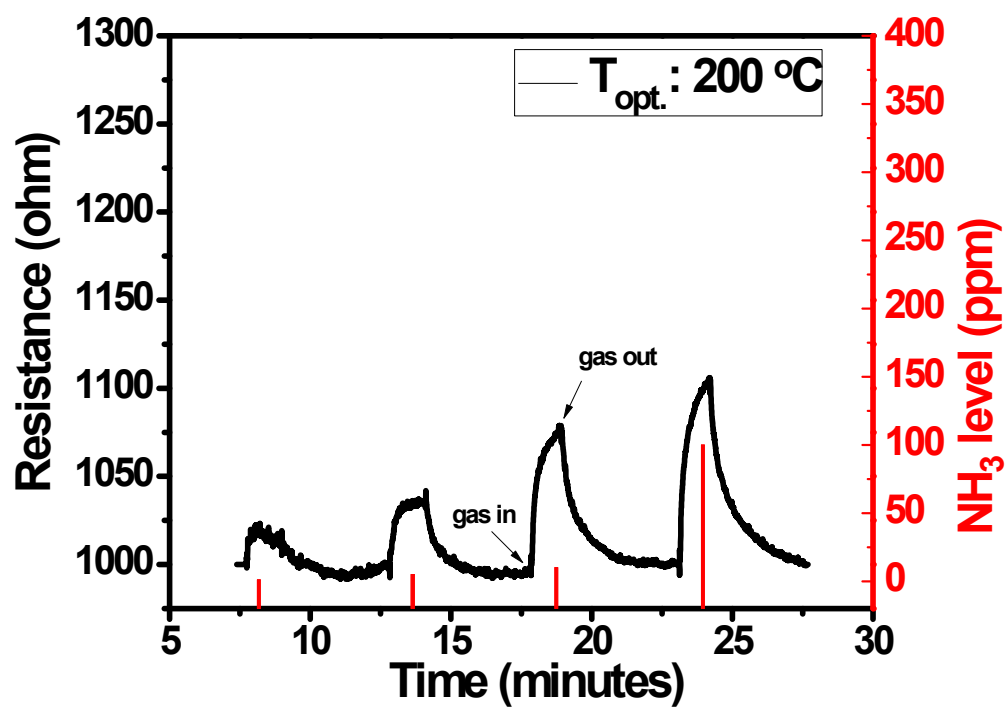

Figure S14. Nirav Joshi et al.

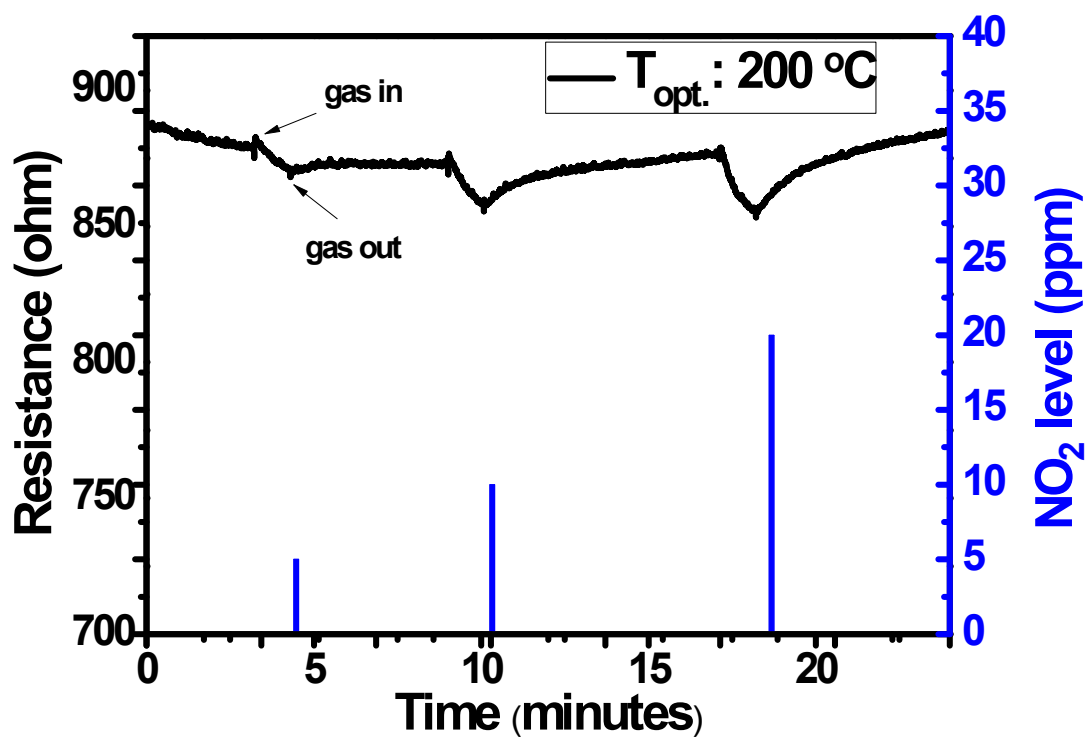

Figure S15. Nirav Joshi et al.
